# Supplementary material
Source: publisher site journal article supplement (https://www.kjim.org/upload/media/kjim-2019-395-suppl2.pdf)
Supplement: Supplementary file 1 [file kjim-2019-395-suppl2.pdf]

**Supplementary Table 2. Age and sex profiles of the incident cases of NTM-PD and incidence rate (per 100,000 person-year) during the study period**

| Age group,<br>yr | Incident cases of NTM-PD |                         |            |                         | Rate<br>ratio <sup>a</sup> | Total number |            |
|------------------|--------------------------|-------------------------|------------|-------------------------|----------------------------|--------------|------------|
|                  | Male                     |                         | Female     |                         |                            | Male         | Female     |
|                  | No. (%)                  | Incidence rate (95% CI) | No. (%)    | Incidence rate (95% CI) |                            |              |            |
| 30–39            | 5 (1.2)                  | 0.5 (0.2–1.1)           | 19 (3.2)   | 1.1 (0.7–1.8)           | 2.4                        | 1,081,209    | 1,704,841  |
| 40–49            | 13 (3.1)                 | 0.9 (0.5–1.6)           | 74 (12.4)  | 3.5 (2.8–4.5)           | 3.9                        | 1,445,775    | 2,091,878  |
| 50–59            | 69 (16.5)                | 3.2 (2.5–4.1)           | 207 (34.6) | 7.2 (6.3–8.3)           | 2.2                        | 2,129,300    | 2,869,038  |
| 60–69            | 143 (34.1)               | 6.1 (5.2–7.2)           | 158 (26.4) | 6.2 (5.3–7.3)           | 1.0                        | 2,338,416    | 2,531,907  |
| 70–79            | 150 (35.8)               | 9.1 (7.7–10.7)          | 108 (18.1) | 6.8 (5.6–8.2)           | 0.7                        | 1,654,679    | 1,596,645  |
| ≥ 80             | 36 (8.6)                 | 9.5 (6.7–13.2)          | 28 (4.7)   | 7.5 (5.0–10.9)          | 0.8                        | 380,805      | 375,772    |
| Total            | 419 (100)                | 3.3 (3.0–3.6)           | 598 (100)  | 4.0 (3.7–4.4)           | 1.2                        | 12,798,235   | 14,829,610 |

NTM-PD, nontuberculous mycobacterial pulmonary disease; CI, confidence interval.

<sup>a</sup>Ratio of female to male incidence rate.
